# Supplementary material
Source: PubMed Central journal article supplement (PMC2695360)
Supplement: NIHMS107277-supplement-Supplemental_Data.pdf [file NIHMS107277-supplement-Supplemental_Data.pdf]

## Table of Contents for Supplemental Data, Tables and Figures

1. Supplemental Analytical and NMR Information.
2. Supplemental Table 1 Primers for the construction of EAH mutants.
3. Supplemental Table 2 Primers for the construction of HPO mutants.
4. Supplemental Fig.1 Alignment of 71D subfamily genes and the primers used for cloning of prenaspirodiene oxygenase from *Hyoscyamus muticus*.
5. Supplemental Fig. 2 Mass spectra for reactions products generated by HPO incubated with prenaspirodiene.
6. Supplemental Fig. 3 Mass spectra for reactions products generated by HPO incubated with valencene.
7. Supplemental Fig. 4 Mass spectra for reactions products generated by HPO incubated with EA.
8. Supplemental Fig. 5 Mass spectra for reactions products generated by HPO incubated with EE.
9. Supplemental Fig. 6 CO difference spectra for the wild type and mutant enzymes.
10. Supplemental Fig. 7 Time-dependent consumption of substrate and accumulation of EAH reaction products.

## Supplemental Data 1 Analytical and NMR Information

*General Information for Chemical Structure Analysis* –  $^1\text{H}$  and  $^{13}\text{C}$  NMR spectra were recorded in  $\text{CDCl}_3$  ( $^1\text{H}$ , 7.26;  $^{13}\text{C}$ , 77.0) and benzene- $d_6$  with Varian U500 spectrometers at the University of Illinois. Chemical shifts are in ppm and coupling constants are in Hertz. Infrared (IR) spectra were obtained using a Perkin Elmer Spectrum BX spectrophotometer referenced to polystyrene standard. Data are presented as frequency of absorption ( $\text{cm}^{-1}$ ). Optical rotations were acquired on a JASCO P-1020 Digital Polarimeter. TLC analyses were performed on silica gel 60 F254 precoated, 250- $\mu\text{m}$  plates. All  $R_f$  values are on silica gel TLC plates until otherwise noted. TLC visualizations were performed with 5% phosphomolybdic acid (0.2 M in 2.5% conc.  $\text{H}_2\text{SO}_4/\text{EtOH}$  (v/v)),  $\text{I}_2$ , or UV.

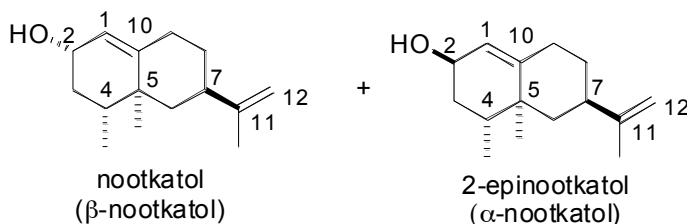

### *Reference Standards of Nootkatol and 2-Epinootkatol*

Reduction of nootkatone (115 mg, 0.53 mmol) with  $\text{LiAlH}_4$  (16 mg, 0.40 mmol) in ether (3 ml) was conducted in a manner similar to literature procedures (S1, S2). Purification by flash chromatography on silica gel (5:1 hexane/ethyl acetate) provided pure samples of nootkatol and 2-epinootkatol.

A search of the Chemical Abstracts data base found 46 references to the nootkatols in numerous patents and journal articles describing ways to obtain the isomers by chemical and biological oxidations of valencene and by chemical and biological reductions of nootkatone, their occurrence as natural products, and their physical properties and practical applications. Although the physical characterization data below appear to be in rather good agreement with the literature data for the nootkatols prepared by hydride reductions of nootkatone (eg  $^1\text{H}$  NMR data, refs 1-5) and the relative stereochemical assignments for the allylic hydroxyl groups are consistent, the names given to the compounds are often different and inconsistent. We prefer the derivative names nootkatol and 2-epinootkatol to avoid the potential confusion associated with  $\alpha$  and  $\beta$  designations that commonly refer to relative configurations.

Data for nootkatol ( $\beta$ -nootkatol,  $2\alpha$ -hydroxyvalencene, (2*R*, 4*R*, 5*S*, 7*R*)-Eremophila-1(10), 11(12)-dien-2-ol): yield 77 mg (66%), oil, TLC  $R_f$  0.20 (4:1 hexane/ethyl acetate);  $^1\text{H}$  NMR ( $\text{CDCl}_3$ , 500 MHz)  $\delta$  5.30 (app q, 1H,  $J_{\text{app}} = 1.5$  Hz, vinyl *H*), 4.66 (m, 2H, vinyl *H*), 4.21 (ddt, 1H,  $J = 9.8, 6.2, 2.1$  Hz, *CHOH*), 2.31 (tdt, 1H,  $J = 14.2, 4.4, 2.0$  Hz, allyl  $\text{CH}_2$ ), 2.23 (tt, 1H,  $J = 12.5, 3.2$  Hz, allyl *CH*), 2.09 (ddd, 1H,  $J = 14.1, 4.2, 2.9$  Hz, allyl  $\text{CH}_2$ ), 1.84 (dt, 1H,  $J = 12.5, 2.4$

Hz, CH<sub>2</sub>), 1.79 (m, 1H, CH<sub>2</sub>CHOH), 1.74 (m, 1H, CH<sub>2</sub>CHOH), 1.69 (quintet, 3H, *J* = 1.0 Hz, CH<sub>3</sub>), 1.49 (dq, 1H, *J* = 14.1, 7.2, 2.4 Hz, CHCH<sub>3</sub>), 1.35 (td, 1H, *J* = 12.7, 10.0 Hz, CH<sub>2</sub>), 1.19 (dtd, 1H, *J* = 13.6, 12.4, 4.0 Hz, CH<sub>2</sub>), 1.27 (dd, 1H, *J* = 13.3, 7.6 Hz, CH<sub>2</sub>), 0.98 (s, 3H, CH<sub>3</sub>), 0.87 (d, 3H, *J* = 7.0 Hz, CH<sub>3</sub>); <sup>13</sup>C NMR (126 MHz, CDCl<sub>3</sub>) δ 150.5, 146.1, 124.6, 108.8, 68.1, 44.7, 40.8, 39.4, 38.3, 37.3, 32.9, 30.0, 21.0, 18.4, 15.6.

Data for 2-epinootkatol ( $\alpha$ -Nootkatol, 2 $\beta$ -hydroxyvalencene, (2*S*, 4*R*, 5*S*, 7*R*)-Eremophila-1(10), 11(12)-dien-2-ol): yield 2.8 mg (3.5%); oil, lit<sup>S4</sup> crystalline solid, mp 77-79 °C; TLC *R*<sub>f</sub> 0.23 (4:1 hexane/ethyl acetate); <sup>1</sup>H NMR (CDCl<sub>3</sub>, 500 MHz) δ 5.50 (m, 1H, vinyl *H*), 4.69 (m, 2H, vinyl *H*), 4.07 (m, 1H, CHOH), 2.31 (tdt, 1H, *J* = 13.9, 4.1, 1.9 Hz, allyl CH<sub>2</sub>), 2.24 (tt, 1H, *J* = 12.0, 2.4 Hz, allyl CH), 2.14 (ddd, 1H, *J* = 14.2, 3.9, 2.6 Hz, allyl CH<sub>2</sub>), 1.89 (dt, 1H, *J* = 12.8, 2.7 Hz, CH<sub>2</sub>), 1.80 (m, 1H, CH<sub>2</sub>CHOH), 1.71 (m, 3H, *J* = 1.0 Hz, CH<sub>3</sub>), 1.69 (m, 1H, CH<sub>2</sub>CHOH), 1.62 (td, 1H, *J* = 12.7, 4.1 Hz, CH<sub>2</sub>), 1.57 (dq, 1H, *J* = 14.0, 3.1, 1.7 Hz, CHCH<sub>3</sub>), 1.24 (dtd, 1H, *J* = 13.4, 12.4, 4.1 Hz, CH<sub>2</sub>), 1.01 (t, 1H, *J* = 12.7 Hz, CH<sub>2</sub>), 0.90 (s, 3H, CH<sub>3</sub>), 0.89 (d, 3H, *J* = 7.1 Hz, CH<sub>3</sub>).

Data for solavetivol (ca 2 mg): TLC *R*<sub>f</sub> = 0.24 (4:1 hexane/ethyl acetate); [ $\alpha$ ]<sup>25</sup><sub>D</sub> +8.3 (*c* = 0.29, CHCl<sub>3</sub>); <sup>1</sup>H NMR (500 MHz, CDCl<sub>3</sub>) δ 5.33 (qt, 1H, *J* = 2.4, 1.2 Hz, =CH), 4.71 (m, 1H, =CH<sub>2</sub>), 4.69 (m, 1H, =CH<sub>2</sub>), 4.18 (tdd, 1H, *J* = 6.3, 2.4, 1.8 Hz, CHOH), 2.50 (tt, 1H, *J* = 11.5, 7.7 Hz, H7), 1.86 (ddd, 1H, *J* = 6.3, 2.6, 1.2 Hz, H7 or H8), 1.83 (ddd, 1H, *J* = 6.0, 2.4, 1.2 Hz, H3 $\alpha$ ), 1.76 (dd, 1H, *J* = 7.1, 1.8 Hz, H3 $\beta$ ), 1.74 (s, 3H, CH<sub>3</sub>), 1.73 (s, 3H, CH<sub>3</sub>), 1.73~1.74 (m, 1H, H4), 1.71 (dd, 1H, *J* = 7.0, 2.3 Hz, H9), 1.60 (tt, 1H, *J* = 8.0, 1.9 Hz, H7 or H8), 1.57 (dd, 1H, *J* = 2.1, 1.5 Hz, H7 or H8), 1.56 (m, 1H, H7 or H8), 1.34 (ddd, 1H, *J* = 12.8, 10.4, 7.9 Hz, H9), 1.34 (s, 1H, OH), 1.00 (d, 3H, *J* = 6.8 Hz, CH<sub>3</sub>); COSY (500 MHz, CDCl<sub>3</sub>) (5.33) δ 4.18; (4.18) δ 5.33, 1.83, 1.76, 1.34; (2.50) δ 1.86, 1.60, 1.57, 1.56; (1.00) δ 1.73~1.74; <sup>1</sup>H NMR NOE (500 MHz, CDCl<sub>3</sub>): Irrad. δ 4.18, obs. 5.33 (3.9%), 1.86 (3.8%), 1.76 ~ 1.74 (3.9%); <sup>13</sup>C NMR (126 MHz, CDCl<sub>3</sub>) δ 148.2, 144.7, 124.9, 108.3, 67.2, 49.0, 47.8, 40.7, 38.0, 37.9, 33.2, 32.9, 21.3, 20.5, 17.4; FTIR (neat film)  $\nu$  3339 (br), 2953, 2872, 1645, 1451, 1376, 1033, 885.

Data for 2 $\beta$ (OH)EA (3.1 mg): TLC *R*<sub>f</sub> = 0.22 (4:1 hexane/ethyl acetate); [ $\alpha$ ]<sup>25</sup><sub>D</sub> -11 (*c* = 0.31, CHCl<sub>3</sub>); <sup>1</sup>H NMR (500 MHz, CDCl<sub>3</sub>) δ 5.64 (tt, 1H, *J* = 6.6, 1.8 Hz, =CH), 4.70 (m, 1H, =CH<sub>2</sub>), 4.67 (m, 1H, =CH<sub>2</sub>), 3.77 (tt, 1H, *J* = 11.4, 5.0 Hz, CHOH), 2.33 (ddd, 1H, *J* = 12.3, 5.3, 2.0 Hz, H3 $\alpha$ ), 2.26 (tddd, 1H, *J* = 11.4, 2.8, 1.9, 0.9 Hz, H1 $\beta$ ), 2.18 (tt, 1H, *J* = 12.4, 3.5 Hz, H7), 2.01 (dtd, 1H, *J* = 16.2, 6.8, 4.2, 2.6, 0.9 Hz, H8), 1.89 (td, 1H, *J* = 12.8, 5.2 Hz, H3 $\beta$ ), 1.81 (tdd, 1H, *J* = 11.5, 3.9, 2.0 Hz, H8), 1.76 (dt, 1H, *J* = 15.8, 3.0 Hz, H6 $\alpha$ ), 1.73 (s, 3H, CH<sub>3</sub>), 1.67 (dd, 1H, *J* = 5.2, 2.1 Hz, H1 $\alpha$ ), 1.64-1.67 (m, 1H, H4), 1.34 (s, 1H, OH), 1.30 (t, 1H, *J* = 13.6 Hz, H6 $\beta$ ), 1.00 (d, 3H, *J* = 7.2 Hz, CH<sub>3</sub>); COSY (500 MHz, CDCl<sub>3</sub>): (5.64) δ 2.01, 2.26; (4.70) and (4.67) δ 1.73; (3.77) δ 1.67, 1.89, 2.33; (1.81) δ 2.01, 2.18, 2.26; (1.30) δ 2.18, 1.76; (1.00) δ 1.64; <sup>13</sup>C NMR (126 MHz,

CDCl<sub>3</sub>)  $\delta$  150.0, 137.9, 132.1, 128.6, 108.4, 67.6, 42.7, 41.7, 41.3, 39.6, 31.7, 30.0, 29.9, 21.0, 18.4; FTIR (neat film)  $\nu$  3339 (br), 2927, 2873, 1459, 1375, 1246, 1057, 887, 747.

Data for 2 $\beta$ (OH)EE (210  $\mu$ g): <sup>1</sup>H NMR (C<sub>6</sub>D<sub>6</sub>, 500 MHz)  $\delta$  5.42 (dd, 1H, *J* = 3.3, 1.9 Hz, vinyl *H*), 4.83 (dq, 1H, *J* = 1.4, 0.7 Hz, vinyl *H*), 4.81 (dq, 1H, *J* = 2.9, 1.5 Hz, vinyl *H*), 4.02 (app ddd, 1H, *J* = 9.1, 5.5, 3.3 Hz, CHOH), 2.45 (dtdd, 1H, *J* = 9.5, 7.3, 3.2, 2.2 Hz, allyl CH<sub>2</sub>), 2.10 (qd, 1H, *J* = 7.3, 6.8 Hz, allyl CH), 1.90 (ddd, 1H, *J* = 13.6, 7.6, 5.9 Hz, allyl CH<sub>2</sub>), 1.78 (dd, 1H, *J* = 13.5, 7.8 Hz, CH<sub>2</sub>), 1.64 (quintet, 3H, *J* = 0.6 Hz, CH<sub>3</sub>), 1.56 (dddd, 1H, *J* = 12.2, 5.5, 2.5, 1.4 Hz, CH<sub>2</sub>CHOH), 1.54-1.52 (m, 1H, CH<sub>2</sub>), 1.52 (dd, 1H, *J* = 13.3, 6.5 Hz, CH<sub>2</sub>), 1.30 (ddd, 1H, *J* = 12.0, 7.1, 2.6 Hz, CHCH<sub>3</sub>), 1.27 (dd, 1H, *J* = 13.3, 7.6 Hz, CH<sub>2</sub>), 1.15 (td, 1H, *J* = 12.1, 9.1 Hz, CH<sub>2</sub>CHOH), 1.01 (s, 3H, CH<sub>3</sub>), 0.79 (d, 3H, *J* = 7.0 Hz, CH<sub>3</sub>); COSY (500 MHz, C<sub>6</sub>D<sub>6</sub>)  $\delta$  5.42 (4.02, 2.45, 1.56), 4.83 (2.10, 1.64), 4.81 (1.64), 4.02 (1.56, 1.15), 2.45 (1.90), 1.78 (1.52), 1.56 (1.15), 1.52 (1.27), 1.30 (0.79).

## References

- S1. Shaffer, G. W.; Eschinasi, E. H.; Purzycki, K. L.; Doerr, A. B. (1975) *J. Org. Chem.* **40**, 2181-2185.
- S2. de Kraker, J. W., Schurink, M., Franssen, M. C. R., Konig, W. A., de Groot, A., and Bouwmeester, H. J. (2003) *Tetrahedron* **59**(3), 409-418
- S3. Sakamaki, H.; Itoh, K.-I.; Taniyai, T.; Kitanaka, S.; Takagi, Y.; Chai, W.; Horiuchi, C. A. (2005) *Journal of Molecular Catalysis B: Enzymatic*, **32**, 103-106.
- S4. Kaspera, R.; Krings, U.; Nanzad, T.; Berger, R. G. (2005) *Appl. Microbiol. Biotechnol.* **67**, 477-483.
- S5. Weyerstahl, P.; Marschall, H.; Splittgerber, U.; Wolf, D. (2000) *Flavour and Fragrance Journal*, **15**, 153-173.

**Supplemental Table 1 Primers for the construction of EAH mutants.**

\*Substrate recognition site (SRS) in which mutation was introduced.

\*\*The codon changed to make the desired mutation was shown in red boldface.

| EAH mutation | SRS | Template* | Primers used for mutagenesis**                                                                                                   |
|--------------|-----|-----------|----------------------------------------------------------------------------------------------------------------------------------|
| S368V        | 5   | EAH       | 5'-GACTTCATCCACCG <b>GT</b> TCCACTTTTGGTCC-3'<br>5'-GGACCAAAAGTGGAA <b>AC</b> CGGTGGATGAAGTC-3'                                  |
| S482V        | 6   | EAH       | 5'-GACTTAGACTTGACCGAATTA <b>GT</b> GGGAATAACTATTGCTAGAAAGGG-3'<br>5'-CCCTTTCTAGCAATAGTTATTCCC <b>ACT</b> AATTCGGTCAAGTCTAAGTC-3' |
| I484V        | 6   | EAH       | 5'-GACTTGACCGAATTATCGGGA <b>G</b> TAACTATTGCTAGAAAGGG-3'<br>5'-CCCTTTCTAGCAATAGTTA <b>CT</b> CCCGATAATTCGGTCAAGTC-3'             |
| I486A        | 6   | EAH       | 5'-CGAATTATCGGGAATAACT <b>GCT</b> GTAGAAAGGGTGGCC-3'<br>5'-GGCCACCCTTTCTAGCA <b>GCG</b> AGTTATTCCCGATAATTCG-3'                   |
| S368V/S482V  | 5+6 | EAH-S368V | 5'-GACTTAGACTTGACCGAATTA <b>GT</b> GGGAATAACTATTGCTAGAAAGGG-3'<br>5'-CCCTTTCTAGCAATAGTTATTCCC <b>ACT</b> AATTCGGTCAAGTCTAAGTC-3' |
| S368V/I484V  | 5+6 | EAH-S368V | 5'-GACTTGACCGAATTATCGGGA <b>G</b> TAACTATTGCTAGAAAGGG-3'<br>5'-CCCTTTCTAGCAATAGTTA <b>CT</b> CCCGATAATTCGGTCAAGTC-3'             |
| S368V/I486A  | 5+6 | EAH-S368V | 5'-CGAATTATCGGGAATAACT <b>GCT</b> GTAGAAAGGGTGGCC-3'<br>5'-GGCCACCCTTTCTAGCA <b>GCG</b> AGTTATTCCCGATAATTCG-3'                   |

### Supplemental Table 2 Primers for the construction of HPO mutants.

\*Substrate recognition site (SRS) in which mutation was introduced.

\*\*The codon changed to make the desired mutation was shown in red boldface.

| HPO mutation            | SRS* | Template      | Primers used for mutagenesis**                                                                                                                                          |
|-------------------------|------|---------------|-------------------------------------------------------------------------------------------------------------------------------------------------------------------------|
| V366S                   | 5    | HPO           | 5'-GACTCCATCCACCA <b>TC</b> TCCACTTTTGGTCC-3'<br>5'-GGACCAAAAGTGGAG <b>AT</b> TGGTGGATGGAGTC -3'                                                                        |
| V480S                   | 6    | HPO           | 5'-GACTTGGATTTGACAGAATTG <b>AG</b> TGGAGTAACTGCTGCCAGAAAGAG-3'<br>5'-CTCTTTCTGGCAGCAGTTACTCCA <b>CT</b> CAATTCTGTCAAATCCAAGTC-3'                                        |
| V482I                   | 6    | HPO           | 5'-GACAGAATTGGTTGGA <b>A</b> TAACTGCTGCCAGAAAGAG-3'<br>5'-CTCTTTCTGGCAGCAGTTA <b>TT</b> CCAACCAATTCTGTGC-3'                                                             |
| A484I                   | 6    | HPO           | 5'-GAATTGGTTGGAGTAACT <b>AT</b> TGCCAGAAAGAGTGATC-3'<br>5'-GATCACTCTTTCTGGCA <b>AT</b> AGTTACTCCAACCAATTC-3'                                                            |
| V480S/V482I             | 6    | HPO           | 5'-GACTTGGATTTGACAGAATTG <b>AG</b> TGG <b>A</b> TAACTGCTGCCAGAAAGAGTG-3'<br>5'-CACTCTTTCTGGCAGCAGTTA <b>TT</b> CCA <b>CT</b> CAATTCTGTCAAATCCAAGTC-3'                   |
| V480S/A484I             | 6    | HPO           | 5'-GACTTGGATTTGACAGAATTG <b>AG</b> TGGAGTAACT <b>AT</b> TGCCAGAAAGAGTG-3'<br>5'-CACTCTTTCTGGCA <b>AT</b> AGTTACTCCA <b>CT</b> CAATTCTGTCAAATCCAAGTC-3'                  |
| V482I/A484I             | 6    | HPO           | 5'-GACTTGGATTTGACAGAATTGGTTGGA <b>A</b> TAACT <b>AT</b> TGCCAGAAAGAGTG-3'<br>5'-CACTCTTTCTGGCA <b>AT</b> AGTTA <b>TT</b> CCAACCAATTCTGTCAAATCCAAGTC-3'                  |
| V480S/V482I/A484I       | 6    | HPO           | 5'-GACTTGGATTTGACAGAATTG <b>AG</b> TGG <b>A</b> TAACT <b>AT</b> TGCCAGAAAGAGTG-3'<br>5'-CACTCTTTCTGGCA <b>AT</b> AGTTA <b>TT</b> CCA <b>CT</b> CAATTCTGTCAAATCCAAGTC-3' |
| V366S/V480S             | 5+6  | HPO-<br>V366S | 5'-GACTTGGATTTGACAGAATTG <b>AG</b> TGGAGTAACTGCTGCCAGAAAGAG-3'<br>5'-CTCTTTCTGGCAGCAGTTACTCCA <b>CT</b> CAATTCTGTCAAATCCAAGTC-3'                                        |
| V366S/V482I             | 5+6  | HPO-<br>V366S | 5'-GACAGAATTGGTTGGA <b>A</b> TAACTGCTGCCAGAAAGAG-3'<br>5'-CTCTTTCTGGCAGCAGTTA <b>TT</b> CCAACCAATTCTGTGC-3'                                                             |
| V366S/A484I             | 5+6  | HPO-<br>V366S | 5'-GAATTGGTTGGAGTAACT <b>AT</b> TGCCAGAAAGAGTGATC-3'<br>5'-GATCACTCTTTCTGGCA <b>AT</b> AGTTACTCCAACCAATTC-3'                                                            |
| V366S/V480S/V482I       | 5+6  | HPO-<br>V366S | 5'-GACTTGGATTTGACAGAATTG <b>AG</b> TGG <b>A</b> TAACTGCTGCCAGAAAGAGTG-3'<br>5'-CACTCTTTCTGGCAGCAGTTA <b>TT</b> CCA <b>CT</b> CAATTCTGTCAAATCCAAGTC-3'                   |
| V366S/V480S/A484I       | 5+6  | HPO-<br>V366S | 5'-GACTTGGATTTGACAGAATTG <b>AG</b> TGGAGTAACT <b>AT</b> TGCCAGAAAGAGTG-3'<br>5'-CACTCTTTCTGGCA <b>AT</b> AGTTACTCCA <b>CT</b> CAATTCTGTCAAATCCAAGTC-3'                  |
| V366S/V482I/A484I       | 5+6  | HPO-<br>V366S | 5'-GACTTGGATTTGACAGAATTGGTTGGA <b>A</b> TAACT <b>AT</b> TGCCAGAAAGAGTG-3'<br>5'-CACTCTTTCTGGCA <b>AT</b> AGTTA <b>TT</b> CCAACCAATTCTGTCAAATCCAAGTC-3'                  |
| V366S/V480S/V482I/A484I | 5+6  | HPO-<br>V366S | 5'-GACTTGGATTTGACAGAATTG <b>AG</b> TGG <b>A</b> TAACT <b>AT</b> TGCCAGAAAGAGTG-3'<br>5'-CACTCTTTCTGGCA <b>AT</b> AGTTA <b>TT</b> CCA <b>CT</b> CAATTCTGTCAAATCCAAGTC-3' |

71D4 (23) 5' -ATGCAATTCTTGAGCTTGGCTTCCATCTTCCTTTTTCTATCTTTTCTGTTTTTGTAAAGGAAATGGAA  
 71D6 (1) 5' ----CCAAAATGCAA-TTGATTTCCATTTTTCTTTTCATATGTTTCCTCTTTTTGTAAAGGAAATGGAA  
 71D7 (1) 5' -----ATGCAA-TTGGTTTCCATTTTTCTTTTCATATCTTTTCCTCTTTTTGTAAAGGAAATGGAA  
 71D16 (1) 5' -ATGCAGTTCTTCAACTTCTTTTCCCTTTTTCTTTTGTGTCATTTCTCTTTTTATTTAAGGAAATGGAA  
 71D20 (1) 5' -ATGCAATTCTTCAGCTTGGTTTCCATTTTTCTATTCTATCTTTTCCTATTTCTGTTGAGGAAATGGAA

Forward primers

F1

F2

F3

71D4 (1464) GAGTAACTGCTGCCAGAAAAGATGACCTTATTTTGGTTGCCACTCCTTATGAACCACCTCGACAATGA-3'  
 71D6 (1453) GAATGTCTGCGGCTAGTAAGGACGATCTTTACTTGATTGCCACTCCTTATCAACCTTAATGGCATTTA-3'  
 71D7 (1445) GAATTACTGCTGCTAGAAAGGGTGATCTTTACTTAAATTGCCACTCCTCATCAACCTTAA -3'  
 71D16 (1433) GAGCAGCTTGTGCCAGAAAGAATGACCTACACTTGATCGCTACTGCTTATCAACACTGTGAAGAGTGA-3'  
 71D20 (1448) GAATAACTATTGCTAGAAAGGGTGGCCTTTACTTAAATGCCACTCCTTATCAACCTTCTCGAGAGTAA-3'

Reverse primers

R3

R2

R1

**Supplemental Fig.1 Alignment of 71D subfamily genes and the primers used for cloning of premnaspirodiene oxygenase from *Hyoscyamus muticus*.**

Four 71D subfamily genes similar to EAH (71D20) were selected and aligned using vector NTI. Accession number are as follows: CYP71D4 (AJ296346), CYP71D6 (U48434)(ref. Y), CYP71D7 (U48435)(ref. Y), CYP71D16 (AF166332)(35) and CYP71D20 (EAH; AF368376)(25). Arrow shows the position of the primers.

F1 primer, 5'-ATGCAATTCTTCAGCTTGGTTTCC-3';

F2 primer, 5'-TTGGYTTCCATYTTCCWTT-3';

F3 primer, 5'-TTTTYTGTTTRAGGAAATGGAA-3';

R1 primer, 5'-T TACTCTCGAGAAGGTTGATAAGG-3';

R2 primer, 5'-AGAAGGTTTSATAAGGAGT-3';

R3 primer, 5'-AAGGTTTSATAAGGAGTGGCA-3'.

The F1 and R1 primers designed upon the EAH sequence successfully amplified the cDNA fragment from *H. muticus* RNA of similar size to that of EAH. The fragment was cloned into pGEM-T Easy vector (Promega, WI, USA) and sequenced according to standard procedures. Subsequent studies were performed to isolate other similar P450 genes using additional sets of degenerate PCR primers: forward (F2 and F3) and reverse (R2 and R3). PCR fragments obtained from the primer sets of F2-R1 and F2-R2 were cloned into pGEM-T Easy vector and all together 8 clones were sequenced. All of the cDNA sequences were identical to that obtained with the F1-R1 primer set, which represented a full-length cDNA from the indicated start codon (5' ATG) to the stop codon (3' TGA).

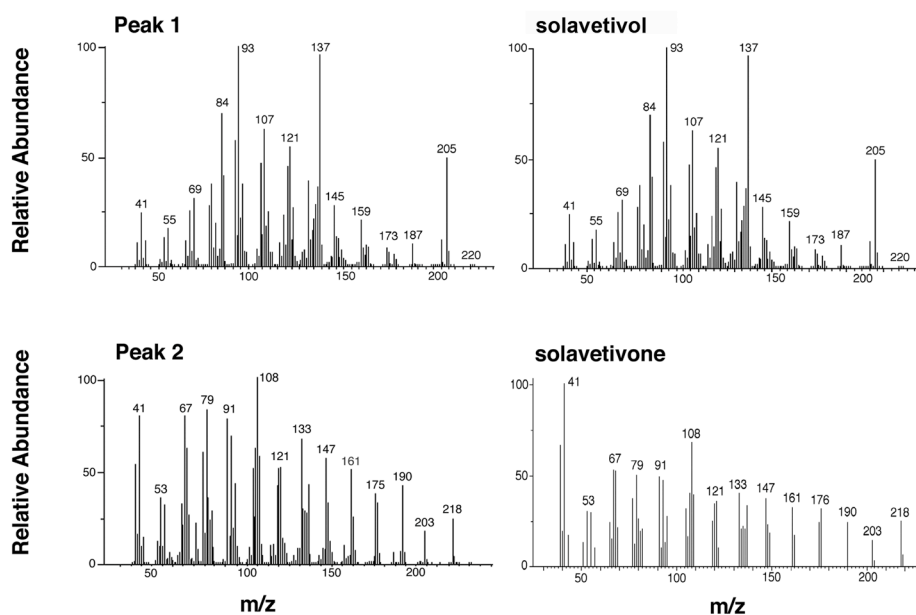

**Supplemental Fig. 2 Mass spectra for reactions products generated by HPO incubated with prenaspirodiene.** Microsomes isolated from yeast over-expressing the HPO cDNA were incubated with 40  $\mu$ M of prenaspirodiene for 30 min before profiling the reaction products by GC/MS. The MS for peaks 1 and 2 noted in Fig. 2A are compared to those for purified solavetivol, and to the NIST library data for solavetivone, respectively.



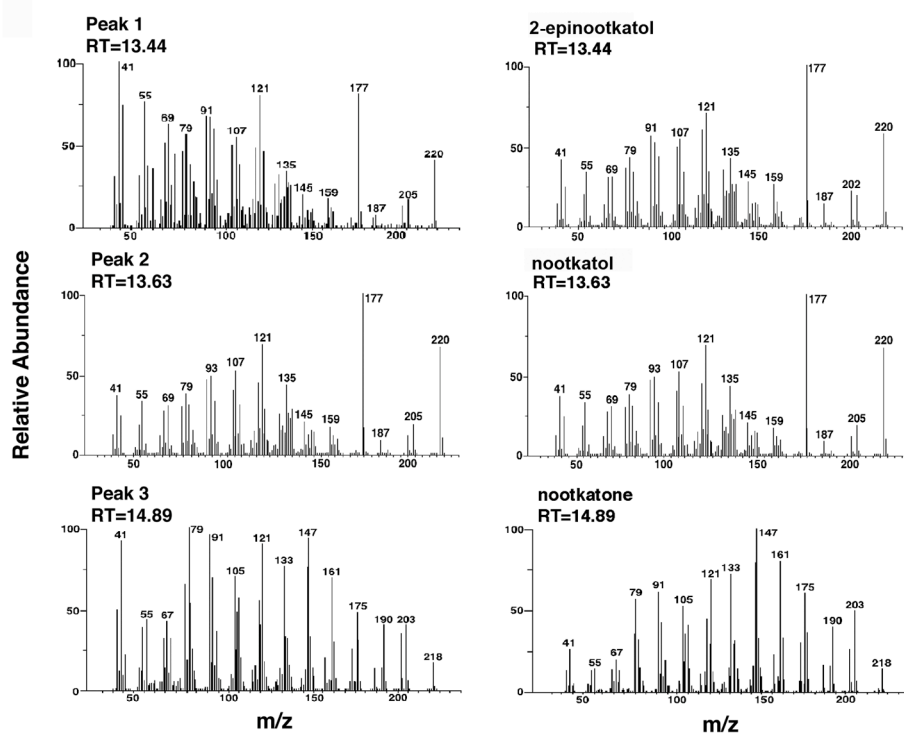

**Supplemental Fig. 3 Mass spectra for reactions products generated by HPO incubated with valencene.** Microsomes isolated from yeast over-expressing the HPO cDNA were incubated with 40  $\mu$ M of premnaspirodiene for 10 min before profiling the reaction products by GC/MS. The MS for peaks 1-3 noted in Fig. 3A are compared to those for authentic  $\alpha$ -nootkatol,  $\beta$ -nootkatol, and nootkatone.

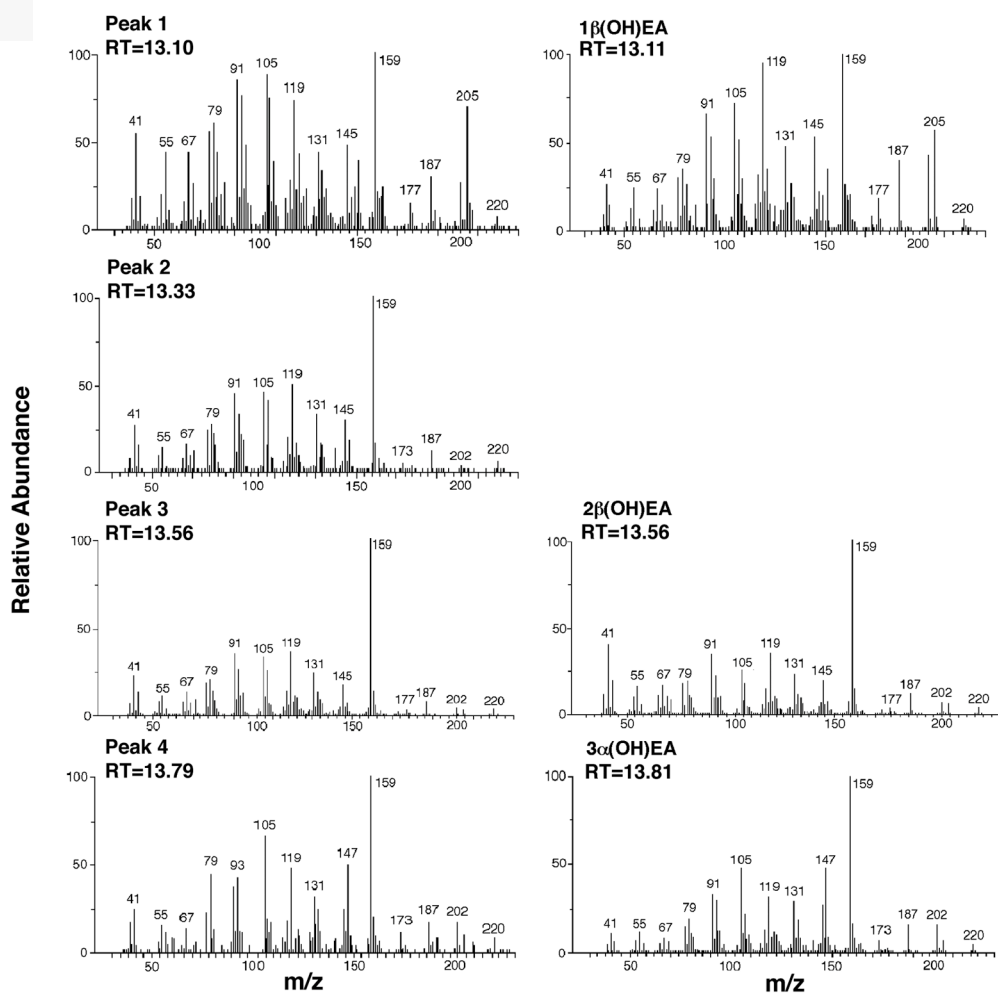

**Supplemental Fig. 4 Mass spectra for reactions products generated by HPO incubated with EA.** Microsomes isolated from yeast over-expressing the HPO cDNA were incubated with 40  $\mu$ M of EA for 10 min before profiling the reaction products by GC/MS. The MS for peaks 1-4 noted in Fig. 4A are compared to those for authentic 1 $\beta$ (OH)EA, 2 $\beta$ (OH)EA and 3 $\alpha$ (OH)EA.

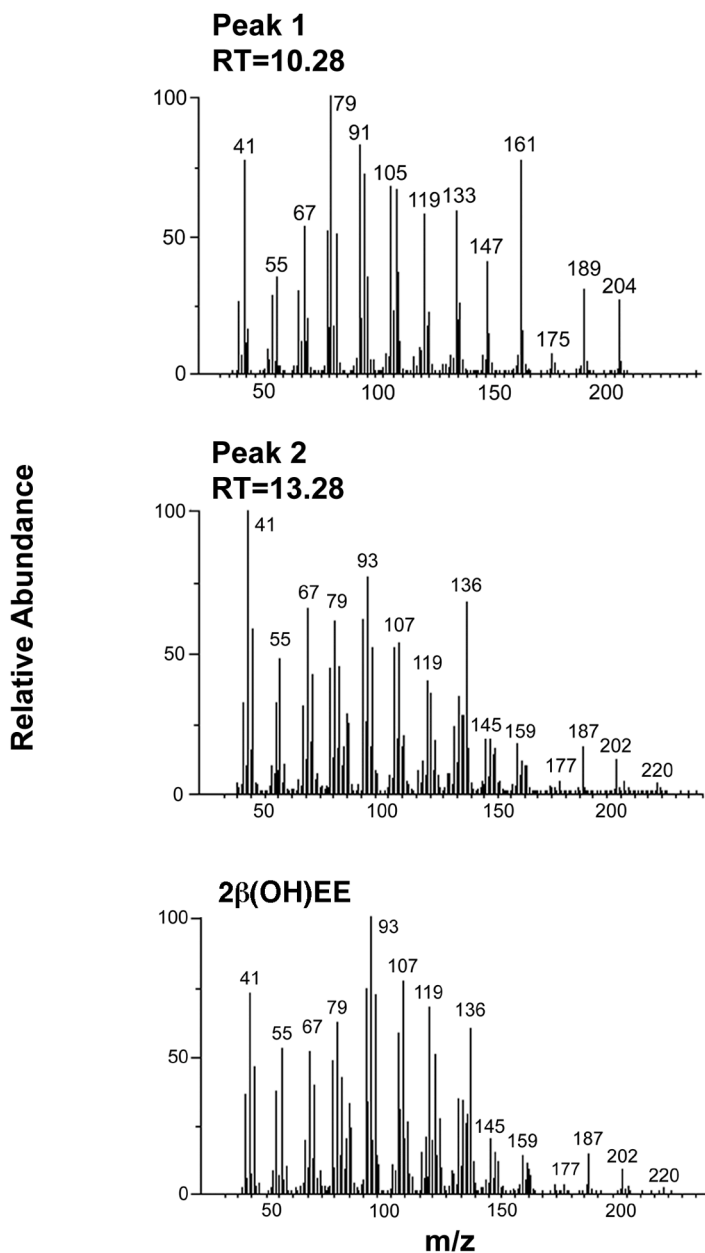

**Supplemental Fig. 5 Mass spectra for reactions products generated by HPO incubated with EE.** Microsomes isolated from yeast over-expressing the HPO cDNA were incubated with the mixture of 30  $\mu$ M EE (peak 1 in Fig. 5) and 10  $\mu$ M of a double bond isomer of EE (\*, Fig. 5) for 10 min before profiling the reaction products by GC/MS. The MS for peaks 1 and 2 noted in Fig. 5 are compared to that for 2 $\beta$ (OH)EE.

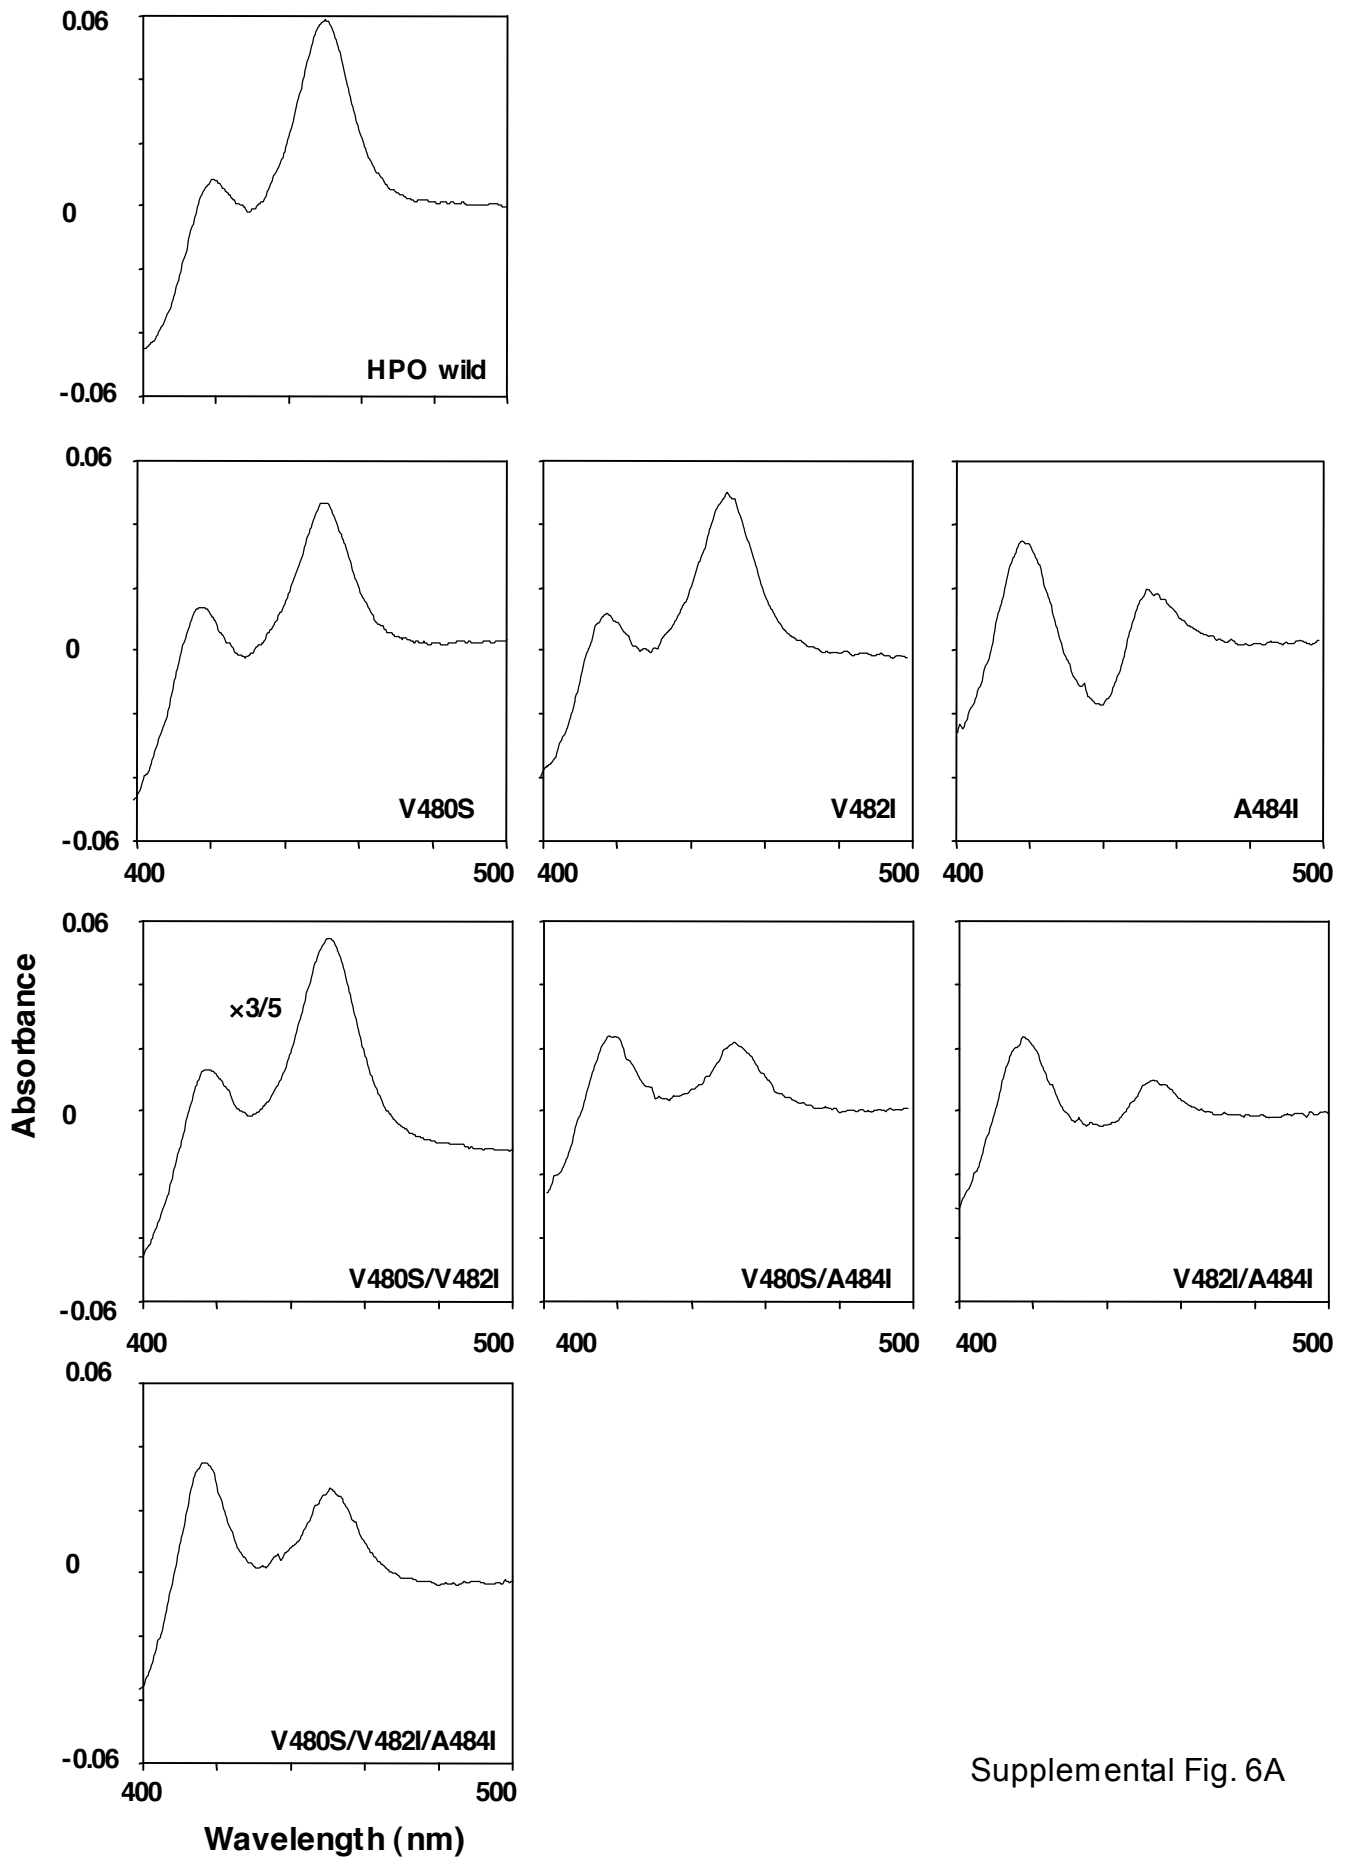

Supplemental Fig. 6A

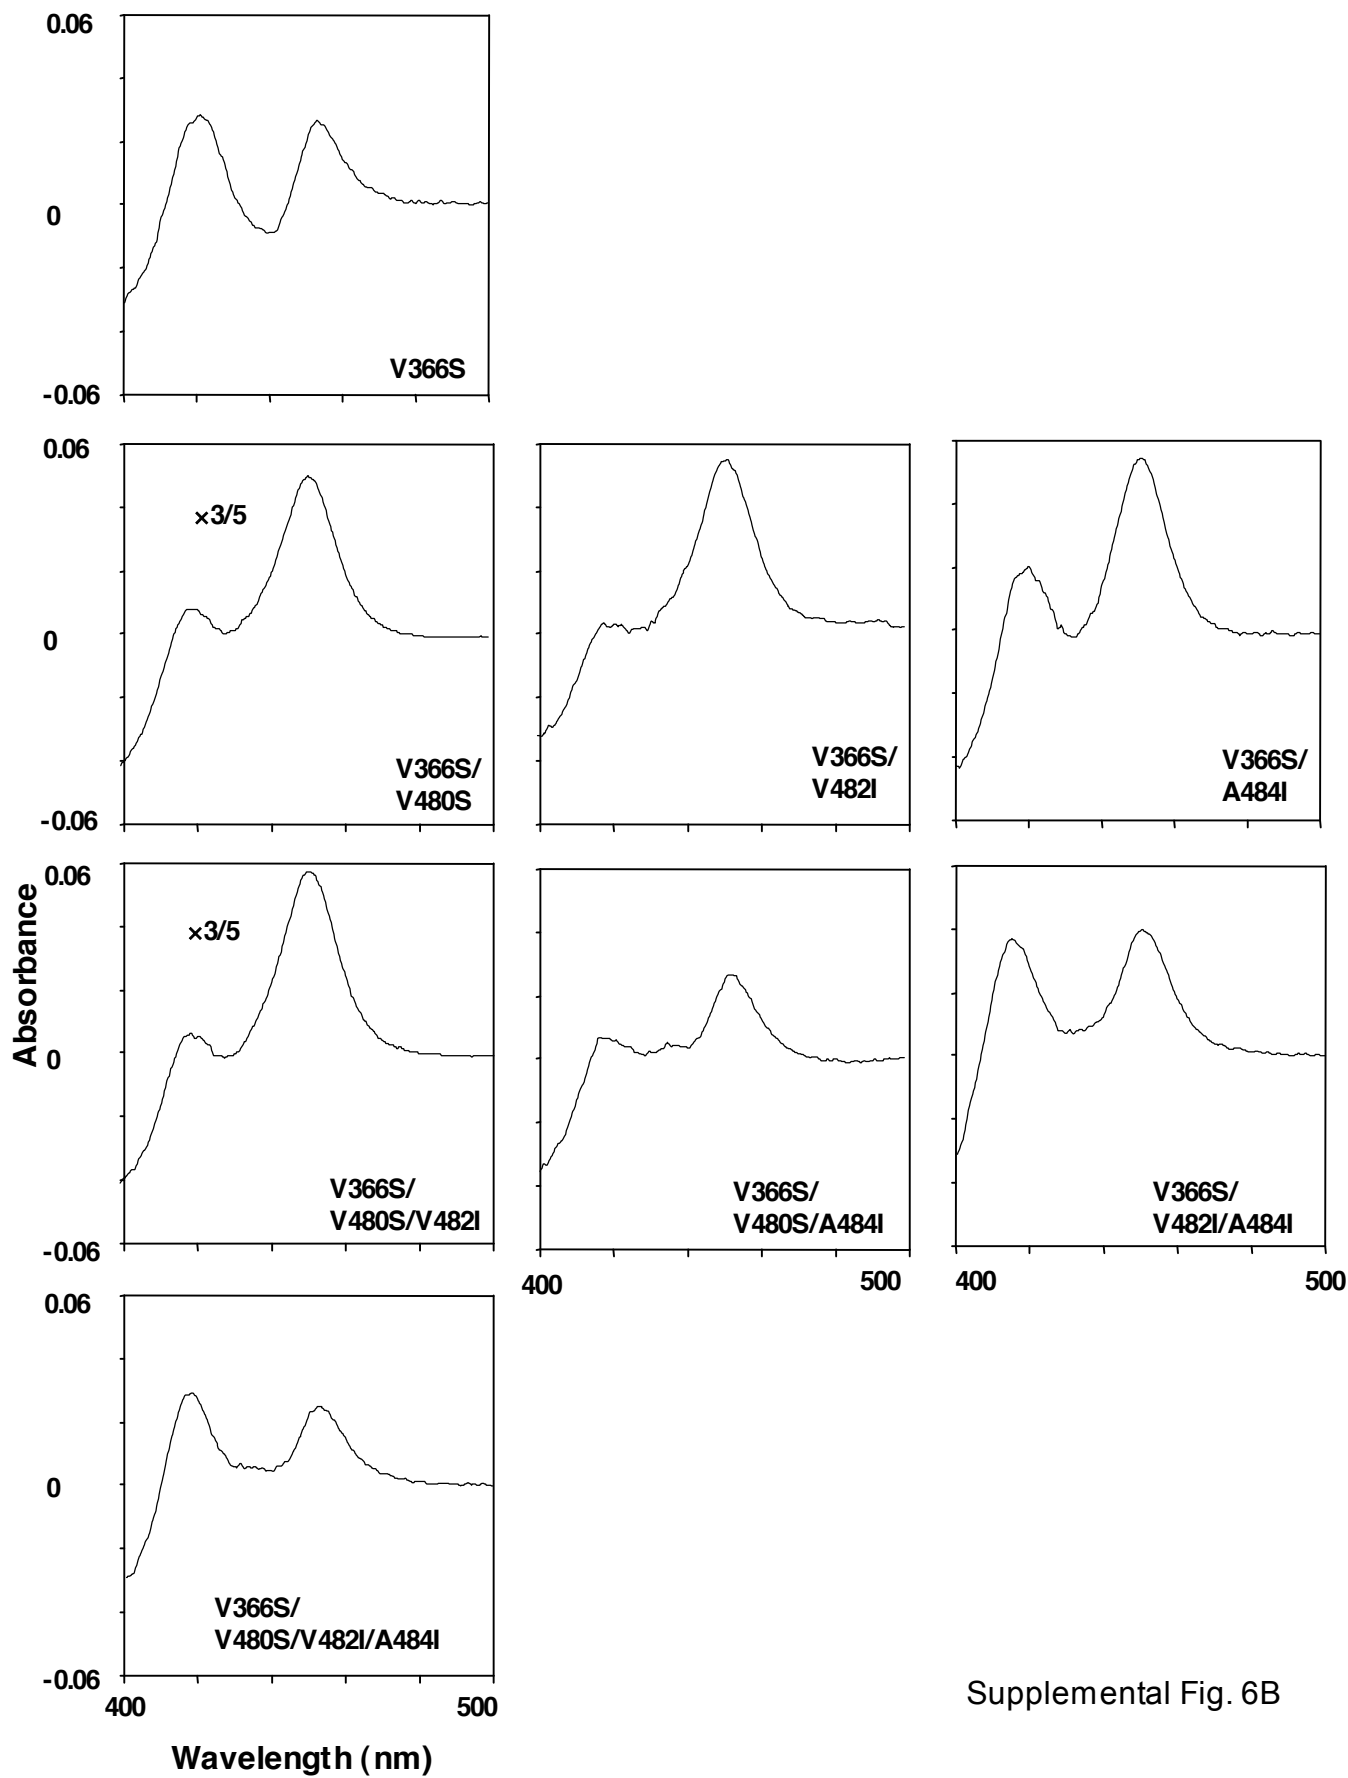

Supplemental Fig. 6B

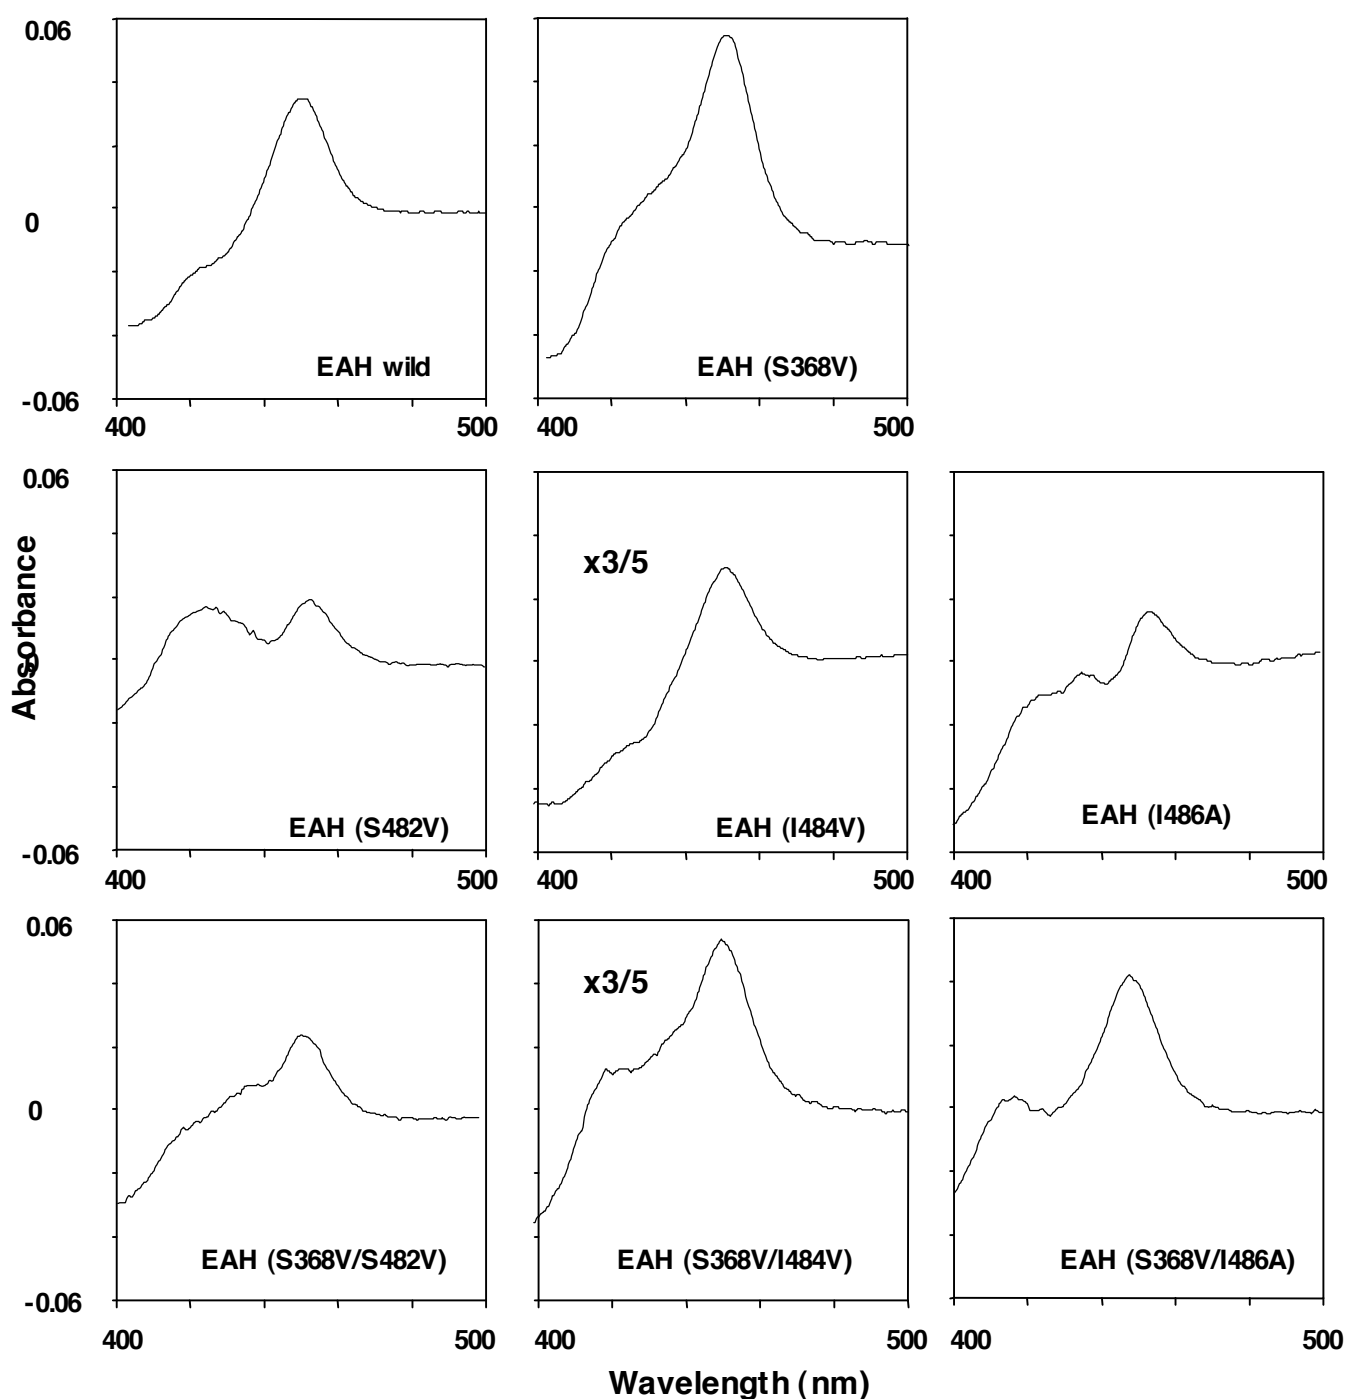

Supplemental Fig. 6C

**Supplemental Fig. 6 CO difference spectra for the wild type and mutant enzymes.**

Reciprocal mutations between EAH and HPO were introduced in SRS 5 and 6 as described in the EXPERIMENTAL PROCEDURES. The mutant genes were expressed in yeast, and the extracted microsomes were used for CO difference spectroscopy to quantify and normalize the amount of properly folded CYP enzymes used in subsequent enzyme assays. CO difference spectra for mutations in SRS 6 of HPO (A), mutations in SRS 5 and 6 of HPO (B), and mutations in SRS 5 and 6 of EAH (C).

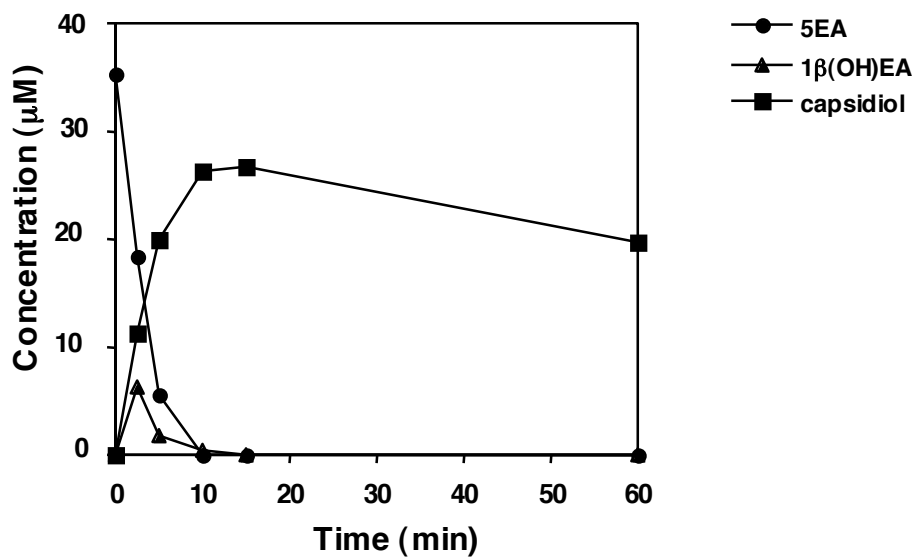

**Supplemental Fig. 7 Time-dependent consumption of substrate and accumulation of EAH reaction products.** EAH was incubated with 40  $\mu\text{M}$  EA (●) for 2, 5, 10, 15 and 60 min, and the ethyl acetate-extractable products were analyzed by GC/MS. 1 $\beta$ (OH)EA (▲) and capsidiol (■) were the only NADPH-dependent products detected.
